# Supplementary material for: Reaction pathways for HCN on transition metal surfaces
Source: Royal Society of Chemistry journal article supplement (doi:10.1039/c8cp07548d), 2019-01-01
Supplement: c8cp07548d1.pdf [file c8cp07548d1.pdf]

## Supporting Information

### Reaction pathways for HCN on transition metal surfaces

*Mohammed K. Abdel-Rahman<sup>a</sup>, Xu Feng<sup>a</sup>, Mark Muir<sup>a</sup>, Kushal Ghale<sup>b</sup>, Ye Xu<sup>b</sup>, and Michael Trenary<sup>\*a</sup>*

<sup>a</sup> Department of Chemistry, University of Illinois at Chicago, 845 West Taylor Street, Chicago, Illinois 60607, United States

<sup>b</sup> Department of Chemical Engineering, Louisiana State University, Patrick F. Taylor Hall, Baton Rouge, LA 70803, United States

\*Corresponding author email: [mtrenary@uic.edu](mailto:mtrenary@uic.edu)

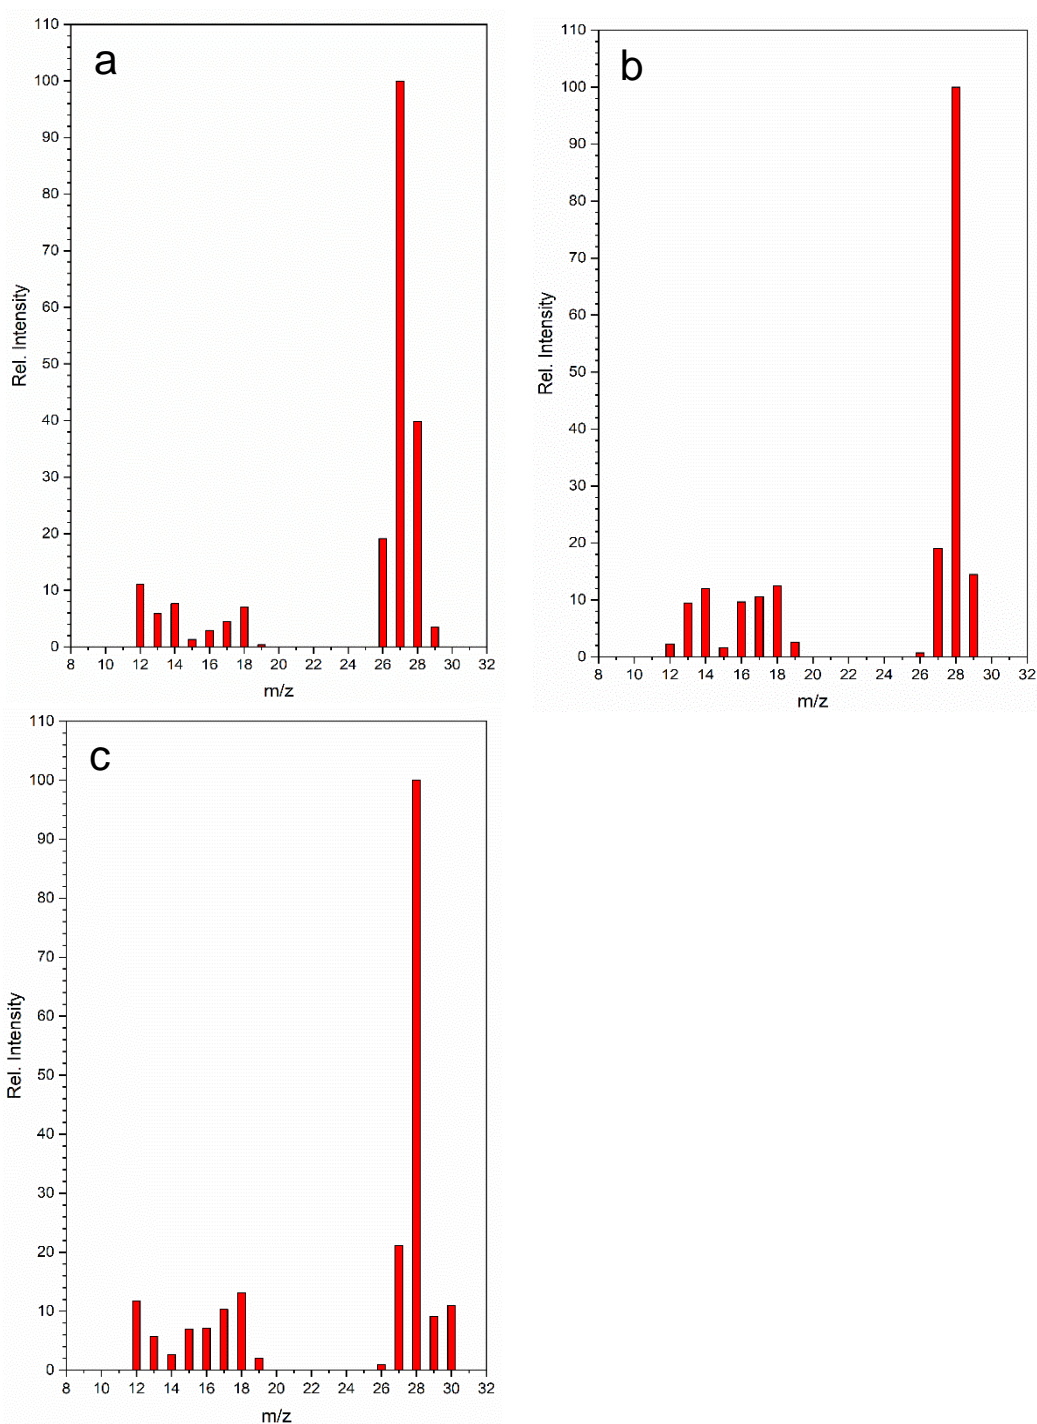

**Figure S1:** Mass spectra of  $5.0 \times 10^{-8}$  Torr of  $\text{H}^{12}\text{C}^{14}\text{N}$  (a),  $\text{H}^{13}\text{C}^{14}\text{N}$  (b), and  $\text{H}^{12}\text{C}^{15}\text{N}$  (c). The synthesized products were determined to be pure by comparing the relative intensity of mass number 26 for  $\text{H}^{12}\text{C}^{14}\text{N}$  (27 for the heavier isotopes) with that of the electron impact mass spectrum of HCN in the NIST database. An intensity of 20% relative to the parent mass number (27 for  $\text{H}^{12}\text{C}^{14}\text{N}$  and 28 for the heavier isotopes) agrees with the national standard indicating successful synthesis and purification of HCN.

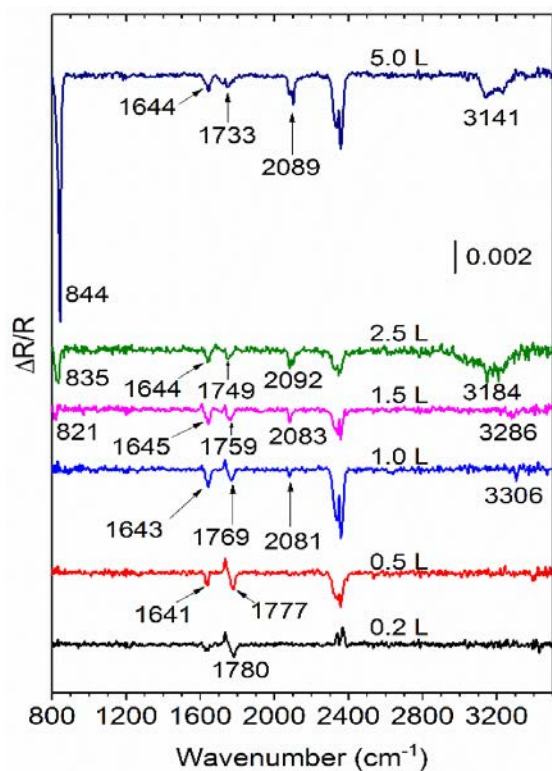

**Figure S2:** RAIR spectra of  $\text{H}^{12}\text{C}^{14}\text{N}$  on Pd(111) taken at 90 K on clean Pd(111). The band at  $821\text{ cm}^{-1}$  seen in the 1.5 L spectrum that shifts to  $844\text{ cm}^{-1}$  for 5.0 L is due to the HCN bending mode, which only appears in the multilayer spectra. Solid HCN begins forming at exposures of 2.5 L as indicated by the broad C-H stretching mode at  $3184\text{ cm}^{-1}$ .

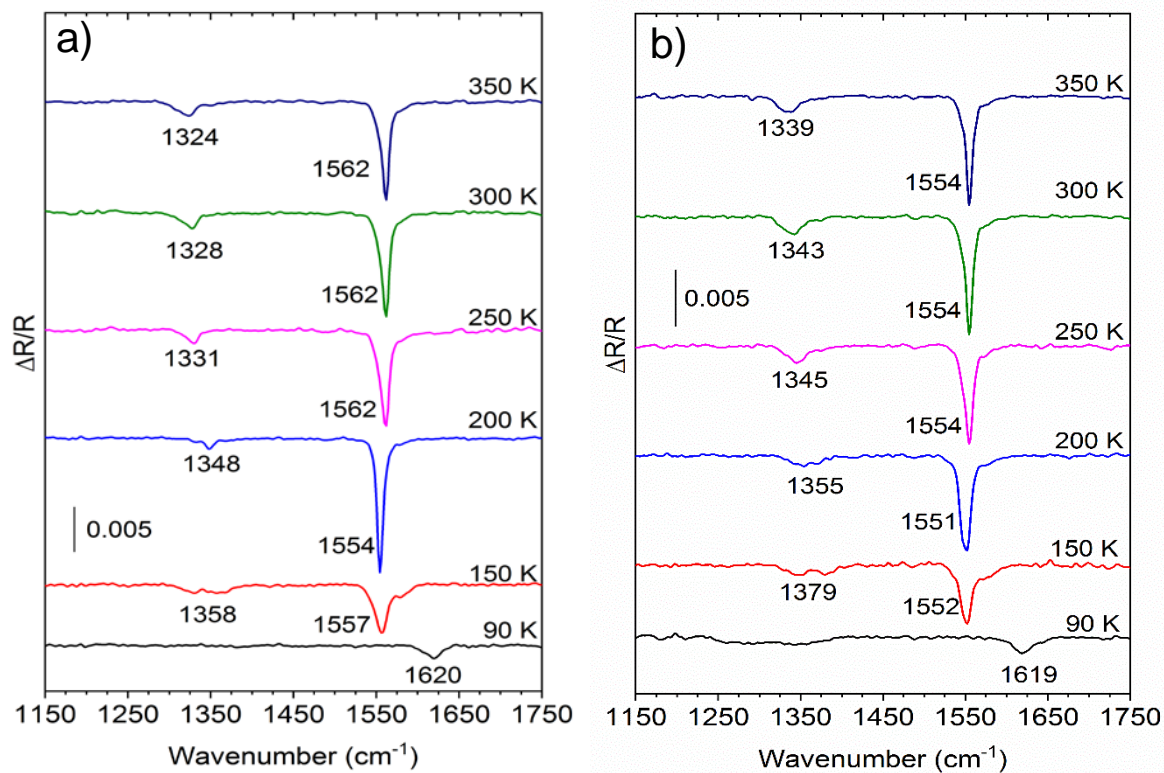

**Figure S3:** RAIR spectra of a) 1.0 L  $\text{H}^{13}\text{C}^{14}\text{N}$  and b) 1.0 L  $\text{H}^{12}\text{C}^{15}\text{N}$  on Pd(111) taken at 90 K after annealing for 1 minute at the indicated temperatures.

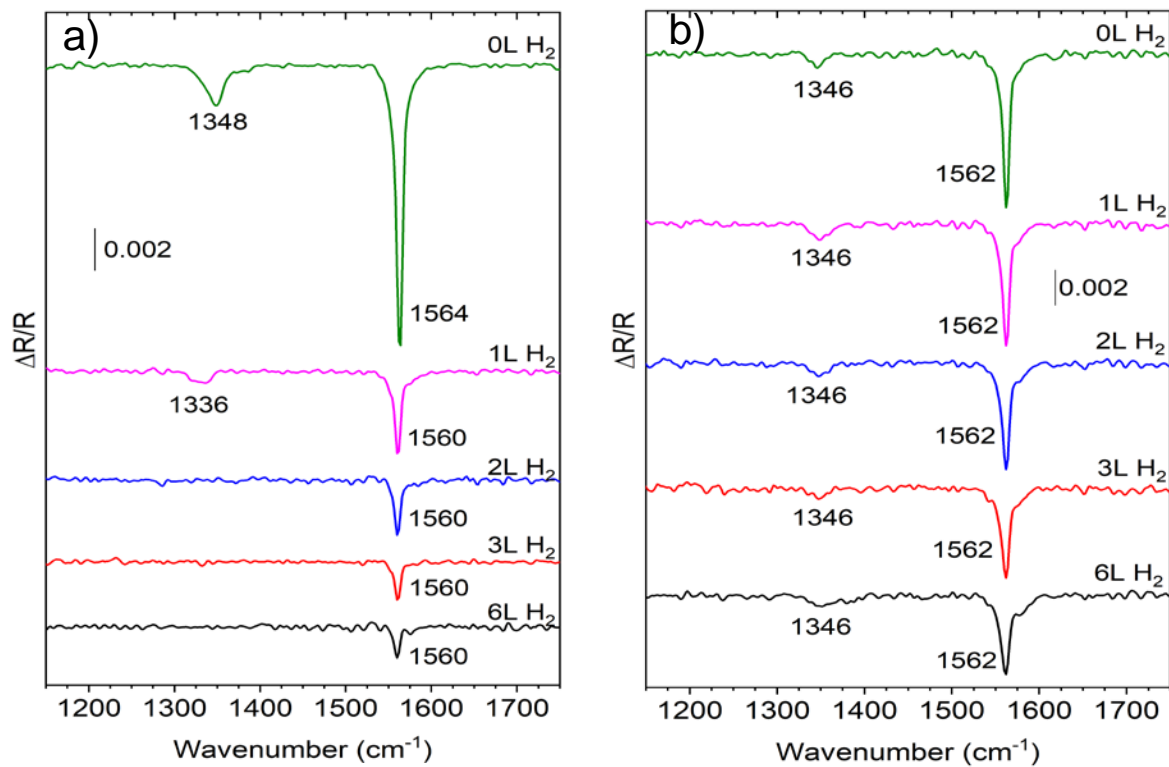

**Figure S4:** RAIR spectra taken at 90 K after annealing to 300 K for 1 min of  $\text{H}^{12}\text{C}^{14}\text{N}$  on Pd(111) pre-exposed to  $\text{H}_2$  (a) and exposed to  $\text{H}_2$  after HCN exposure (b). Pre-exposure to  $\text{H}_2$  reduced the amount of aminocarbene formed more than for post-HCN exposure to  $\text{H}_2$ .

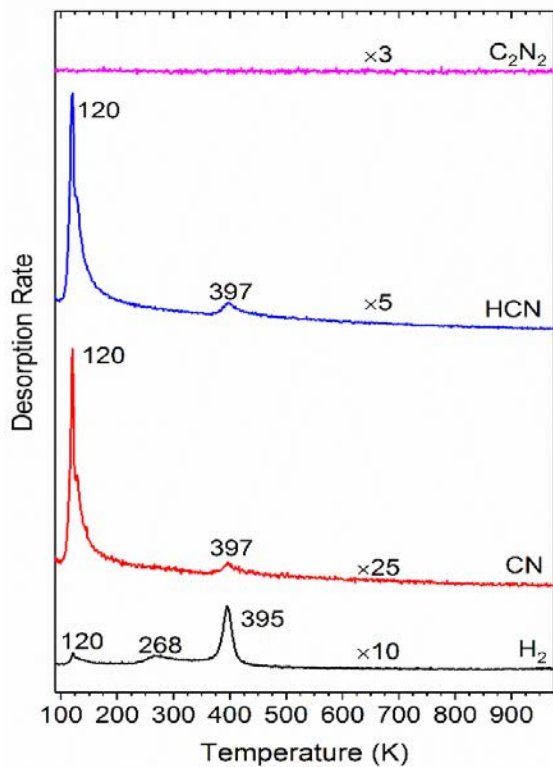

**Figure S5:** TPR spectra of 5.0 L HCN on Pd(111) taken from 90-1000 K at a heating rate of 1.5 K/s. Desorption of H<sub>2</sub> and HCN were observed at ~400 K. Although observed in other studies,<sup>1,2</sup> C<sub>2</sub>N<sub>2</sub> was not observed as a desorption product in this work.

### Calculated adsorption energies of various fragments using different methods

Based on the adaptive summing method of Hensley et al.,<sup>3</sup> when the GGA-RPBE  $\Delta E_{\text{ads}}$  value for a gas molecule falls roughly below 70% of the corresponding value in optB86b-vdW, one may expect the contribution of vdW to the adsorption energy on a transition metal surface like Pd(111) to become significant. Table S1 lists the  $\Delta E_{\text{ads}}$  of several surface species that may be referenced directly to stable gas-phase species. See Ref. 3 for definition of the parameters  $x$  and  $f$ . An adaptively weighted sum of GGA-RPBE and optB86b-vdW  $\Delta E_{\text{ads}}$  is found to be on average more accurate than that calculated using either functional alone. When  $f = 1$  (as is the case for all the organic species listed in Table S1), this sum consists entirely of the optB86b-vdW  $\Delta E_{\text{ads}}$ . When  $f = 0$ , the sum consists entirely of the GGA-RPBE  $\Delta E_{\text{ads}}$ . Thus Table S1 indicates that GGA-RPBE under-binds the organic species but is adequate for describing H adsorption, on Pd(111). Comparison with available literature data suggests this conclusion to be correct.

Table S1: DFT-calculated adsorption energies ( $\Delta E_{\text{ads}}$ , in eV) of several molecular and atomic intermediates in HCN decomposition on Pd(111), and their associated adaptive summing parameters ( $x$  and  $f$ ).

| Species                         | $\Delta E_{\text{ads}}$ |                      | $\Delta E_{\text{ads}}$ |      | $\Delta E_{\text{ads}}$<br>Exp. Lit. |
|---------------------------------|-------------------------|----------------------|-------------------------|------|--------------------------------------|
|                                 | GGA-RPBE                | optB86b-vdW          | $x$                     | $f$  |                                      |
| HCN upright                     | 0.00 <sup>2</sup>       | -0.56 <sup>2</sup>   | 1.00                    | 1.00 | -0.39 <sup>1</sup>                   |
| HCN di-s                        | -0.47 <sup>2</sup>      | -1.29 <sup>2</sup>   | 0.63                    | 1.00 |                                      |
| (HCN) <sub>2</sub> <sup>a</sup> | -0.15 <sup>2,3</sup>    | -1.02 <sup>2,3</sup> | 0.86                    | 1.00 |                                      |
| CNH                             | -1.08 <sup>2</sup>      | -1.80 <sup>2</sup>   | 0.40                    | 1.00 |                                      |
| H                               | -0.39 <sup>4</sup>      | -0.57 <sup>4</sup>   | 0.31                    | 0.01 | -0.44 <sup>5</sup>                   |

Each adsorbate is located on a (2×2) surface unit cell at 1/4 ML coverage.  $\Delta E_{\text{ads}}$  is with respect to each adsorbate in gas phase and is non-ZPE corrected.

<sup>1</sup> From Ref. 2

<sup>2</sup> With respect to gas-phase HCN.

<sup>3</sup> Per unit of HCN.

<sup>4</sup> With respect to gas-phase H<sub>2</sub>, per H atom.

<sup>5</sup> From Ref. 4.

## References

1. M. E. Kordesch, W. Stenzel and H. Conrad, *J. Electron. Spec. Rel. Phen.*, 1986, **39**, 89-96.
2. X. Guo, A. Hoffman and J. T. Yates, *J. Phys. Chem.*, 1989, **93**, 4253-4258.
3. A. J. R. Hensley, K. Ghale, C. Rieg, T. Dang, E. Anderst, F. Studt, C. T. Campbell, J.-S. McEwen and Y. Xu, *J. Phys. Chem. C*, 2017, **121**, 4937-4945.
4. J. Wellendorff, T. L. Silbaugh, D. Garcia-Pintos, J. K. Nørskov, T. Bligaard, F. Studt and C. T. Campbell, *Surf. Sci.*, 2015, **640**, 36-44.
